# Supplementary material for: Identifying and Selecting Priority Setting Criteria for an Exploratory Multi-Criteria Decision Analysis Study for Health Benefit Package Design in Kenya
Source: Research Square preprint supplement (doi:10.21203/rs.3.rs-6630410/v1), 2025-05-16
Supplement: Supplementary file 1 [file 20bcb2828075fc002db1a98e.docx]

**Additional file 1: Criteria used by HBPAP when defining the UHC-EBP.**

| **Criterion** | **lay definition of criteria** | **Technical definition of criteria** |
| --- | --- | --- |
| Effectiveness and safety | “Whether the service delivers an improvement in health status and is safe for use” [9, p.13]. | “Services that are effective and safe in the prevention and management of morbidity and mortality as measured on individual or population level.” [9, p.15] and [41, p.5] |
| Feasibility: Service, Health Products & Technology requirements | “Whether the service can be provided to Kenyans based on existing health system capacity in terms of medicines, drugs, and other service provision requirements” [9, p.13]. | “Services that are easy to implement because of the current service capacity may have priority. E.g., availability of service infrastructure, delivery models, safety and quality and management.” [9, p.16] and [41, p.5]  “Services that are easy to implement because of the current medical products, vaccines and technology capacity may have priority. E.g., is a drug or commodity available in the Kenyan market? Is there reliability in procurement?” [9, p.16] and [41, p.5]. |
| Feasibility: Health workforce requirements | “Whether the service can be provided to Kenyans based on existing health system capacity in terms of human resources” [9, p.13]. | “Services that are easy to implement because of the current service capacity may have priority. E.g., availability of service infrastructure, delivery models, safety and quality and management.” [9, p.16] and [41, p.5]  “Services that are easy to implement because of the current medical products, vaccines and technology capacity may have priority. E.g., is a drug or commodity available in the Kenyan market? Is there reliability in procurement?” [9, p.16] and [41, p.5] |
| Catastrophic health expenditure | “Whether including the service in the health benefits package reduces the financial burden of paying out of pocket for the service” [9, p.13]. | “Services responsible for the greatest burden of catastrophic health expenditure at the population and individual level are prioritized e.g., interventions of rare and/or emerging diseases might be very costly (because of the small number patients) and could push people into poverty. Therefore, these interventions may deserve priority.” [9, p.15] and [41, p.5] |
| Equity | “Whether the service addresses the disparities in access and utilisation of needed health services and health status of Kenyans” [9, p.13]. | “Services that enhance equity of access and equity of health outcomes at the population level may have priority.” [9, p.15] and [41, p.5] |
| Burden of disease | “Whether the service addresses a condition/disease that affects many Kenyans” [9, p.13]. | “Services that focus on a high burden of disease in society may deserve priority.” [9, p.16] and [41, p.5] |
| Severity of disease | “Whether the service addresses the most debilitating forms of a disease to an individual” [9, p.13]. | “Services that focus on a high burden of disease in society may deserve priority.” [9, p.16] and [41, p.5] |
| Affordability | “Whether the country can pay for the health service with current and future resources” [9, p.13]. | “Services that match available resources or that may attract future resources may have priority Fairness in financial contribution.” [9, p.16] and [41, p.5] |
| Cost effectiveness | “Whether the service reflects the best of use of available resources to deliver health gains to Kenyans” [9, p.13]. | “Services that maximize population health outcomes with available resources may deserve priority.” [9, p.16] and [41, p.5] |
| Congruence with existing priorities | “Whether the service is in line with constitution, prevailing laws and prevailing health sector policies and priorities as further investments and policies are made” [9, p.13] | “Services that are in line with existing health sector priorities may have priority.” [9, p.17] and [41, p.5] |

**Adapted from Ministry of Health Kenya [9] who had in turn obtained them from Tromp and Baltussen [41]**
