# Supplementary material for: Identifying and Selecting Priority Setting Criteria for an Exploratory Multi-Criteria Decision Analysis Study for Health Benefit Package Design in Kenya
Source: Research Square preprint supplement (doi:10.21203/rs.3.rs-6630410/v1), 2025-05-16
Supplement: Supplementary file 2 [file 4cde55112b81452482b1caba.docx]

**Additional file 2: Questionnaire: Interview guide**

**SEMI STRUCTURED INTERVIEW GUIDE WITH EXPERTS.**

| **Interview number** |  |
| --- | --- |
| **Date of interview and time** |  |
| **Name of county** |  |

1. **Part A**

[At this point, the interviewer will have explained the purpose of the study to the stakeholder. The stakeholder will have signed the consent form. The interviewer will tell the stakeholder when the recording starts].

1. How old are you (In years)?
2. What gender do you identify with?
3. What is the highest level of education that you have attained/completed?
4. What is your main profession? [Medical doctor, Nurse, pharmacist, clinical officer, health economist, epidemiologist, public health officer, administrator etc]
5. What is your job title/designation and how long have you worked in this position?
6. What type of organisation do you work for and how long have you worked in this organisation?
7. Overall, how many years of work experience do you have [total years of work experience]?
8. Have you ever been involved in the development or revision of a health benefit package? [This refers to whether you were part of a committee or group tasked with the development or revision of a benefit package e.g., Health Benefit Package Advisory Panel, Ministry of Health, NHIF board, stakeholder forums etc]. (If yes, specify which ones).
9. What do you think about the recently launched UHC cover that is offered through the NHIF? In terms of:

- The benefit package.

- The process of developing the package e.g., stakeholder engagement

Use of explicit criteria in defining the package

1. The UHC pilot was conducted in four counties (Isiolo, Kisumu, Machakos, and Nyeri). What did you think about this pilot? In terms of:

- The benefit package.

- The process of developing the package e.g., stakeholder engagement

Use of explicit criteria in defining the package

1. **PART B: Health interventions**
2. What are the country’s priorities when focusing on health interventions and disease areas?

[The interviewer will provide the stakeholders with the list of 14 health interventions and explain they were derived from two research processes with Kenyan stakeholders in 2021.]

1. We have a list of 14 health interventions derived from two studies that we conducted last year with Kenyan stakeholders. These stakeholders included providers (public, private, and faith based), academics, researchers, policy makers, and purchasers (e.g., Ministry of health, county governments). What do you think of these interventions?

- Do the interventions align with the country’s laws, UHC agenda, and prevailing health sector policies and priorities? Use three categories to assign a priority level to each of the 14 health interventions i.e., High Priority. Medium Priority, or Low Priority and provide reasons briefly.
- What level of care should these interventions be offered? Community, primary care (level 2 & 3), secondary (level 4 & 5), tertiary (level 6) or a combination of levels like primary and secondary or all levels?

[Note: Medical devices are intended to be provided to those who are eligible at the point of need].

- 1. Preventive health interventions

Provision of insecticide-treated nets to children and pregnant women attending health centres for Malaria *[High Priority, Medium Priority, and Low Priority? What level of care should these interventions be offered?]*

Covid-19 vaccine for Covid-19 *[High Priority, Medium Priority, and Low Priority? What level of care should these interventions be offered?]*

Promotion of proper diet for ischemic heart disease [*High Priority, Medium Priority, and Low Priority? What level of care should these interventions be offered?]*

- 1. Diagnostic health interventions

Blood glucose monitoring devices e.g., glucometers, test strips for Diabetes *[High Priority, Medium Priority, and Low Priority? What level of care should these interventions be offered?]*

Mobile teleconsultations and referral management *[High Priority, Medium Priority, and Low Priority? What level of care should these interventions be offered?]*

Let’s focus on mobile teleconsultation and referral management. Which disease area should be the highest priority for this intervention?

- 1. Curative health interventions

Insulin Pumps for Diabetes *[High Priority, Medium Priority, and Low Priority? What level of care should these interventions be offered?]*

Immediate Antiretroviral therapy (ART) initiation for all HIV positive individuals *[High Priority, Medium Priority, and Low Priority? What level of care should these interventions be offered?]*

Kidney transplant for End-Stage Kidney Disease *[High Priority, Medium Priority, and Low Priority? What level of care should these interventions be offered?]*

- 1. Rehabilitative health interventions

Mobility aids (crutches, wheelchairs) for transport injuries. *[High Priority, Medium Priority, and Low Priority? What level of care should these interventions be offered?]*

Drugs for opioid withdrawal management e.g., methadone. *[High Priority, Medium Priority, and Low Priority? What level of care should these interventions be offered?]*

Physiotherapy for Stroke *[High Priority, Medium Priority, and Low Priority? What level of care should these interventions be offered?]*

- 1. Palliative health interventions

Breathing machines (B-pap, -pap machines, Oxygen tanks, oxygen concentrators/cylinders) for Chronic Obstructive Pulmonary Disease *[High Priority, Medium Priority, and Low Priority? What level of care should these interventions be offered?]*

Pain management drugs e.g., opioids such as morphine for chronic breast cancer pain *[High Priority, Medium Priority, and Low Priority? What level of care should these interventions be offered?]*

Psychosocial, bereavement support, and counselling for patients, their families, and care givers for major depressive disorders in palliative care *[High Priority, Medium Priority, and Low Priority? What level of care should these interventions be offered?].*

1. **PART C: Priority-setting criteria**

[The interviewer will provide the stakeholder with a list of criteria, their definitions, and levels. Stakeholder will be given time to look at the criteria until they are ready to answer questions. The interviewer will then ask questions]

1. What do you think about these criteria and subcategories (levels) used to describe them?

- Are the criteria understandable and are the definitions clear?
- Do the criteria overlap?
- Are there any criteria you feel are redundant?
- When you look at the effective and safety criterion, what’s your opinion about it?
- There are two criteria, severity of disease and burden of disease. What do you think about these two criteria?

1. What are the enablers and barriers of institutionalising health technology assessment to support universal health coverage in Kenya? e.g., defining or revising a benefit package or essential medicines list
2. What can other countries learn from the Kenyan experience of using health technology assessment to support universal health coverage e.g., defining or revising a benefit package or essential medicines list? Think about enablers and barriers.
3. What can Kenya learn from other countries on using health technology assessment to support universal health coverage? Think about enablers and barriers.

[Stop recording. Thank the stakeholder for their time].

1. Kindly provide your email address and mobile phone number [Only, if necessary, as interviewer may already have the contact details]

PART B Health interventions

| **Intervention domain** | **Intervention type** | **Intervention** | **Main condition** |
| --- | --- | --- | --- |
| Preventive | Devices | Provision of insecticide-treated nets to children and pregnant women attending health centres | Malaria |
| Drugs and vaccines | Covid-19 vaccine | Covid-19 |
| Procedures | Promotion of proper diet | Ischemic Heart Disease |
| Diagnostic | Devices | Blood glucose monitoring devices e.g., glucometers, test strips | Diabetes mellitus |
| Procedures | Mobile teleconsultations and referral management | Cross-cutting |
| Curative | Devices | Insulin Pumps | Diabetes mellitus |
| Drugs | Immediate Antiretroviral therapy (ART) initiation for all HIV positive individuals | HIV/AIDs |
| Procedures | Kidney transplant | End stage kidney disease |
| Rehabilitative | Devices | Mobility aids (crutches, wheelchairs) | Transport Injuries |
| Drugs | Drugs for opioid withdrawal management e.g., methadone | Opioid use disorders |
| Procedures | Physiotherapy | Stroke |
| Palliative | Devices | Breathing machines (B-pap, C-pap machines, Oxygen tanks, oxygen concentrators/cylinders) | Chronic Obstructive Pulmonary Disease |
| Drugs | Pain management drugs e.g., opioids such as morphine | Chronic pain due to Breast cancer |
| Procedures | Psychosocial, bereavement support, and counseling for patients, their families, and care givers | Major Depressive Disorder in palliative care |

PART C Decision making criteria.

| **Category (Domain)** | **Criterion** | **Probable levels** | **Lay definition** | **Technical definition** |
| --- | --- | --- | --- | --- |
| Health level | Effectiveness and safety | 0. Slightly effective and safe  1. Moderately effective and safe  2. Highly effective and safe | “Whether the service delivers an improvement in health status and reducing mortality and is safe for use.” (Ministry of Health Kenya, 2018, p.13) | “Services that are effective and safe in improving and maintaining health status and reducing mortality as measured at individual or population level will be prioritised.” (Ministry of Health Kenya, 2018, p.15) and (Tromp and Baltussen, 2012, p.5) |
| Feasibility | Health systems capacity requirements | 0. Below national average  1. Above national average | “Whether the service can be provided to Kenyans based on existing health system capacity in terms of human resources, medicines, supplies, and other service provision requirements.” (Ministry of Health Kenya, 2018, p.13) | "Services that are easy to implement because of the current service capacity may have priority. E.g., availability of service infrastructure, delivery models, safety and quality and management." (Ministry of Health Kenya, 2018, p.16) and (Tromp and Baltussen, 2012, p.5)  “Services that are easy to implement because of the current medical products, vaccines and technology capacity may have priority. E.g., is a drug or commodity available in the Kenyan market? Is there reliability in procurement?.” (Ministry of Health Kenya, 2018, p.16) and (Tromp and Baltussen, 2012, p.5) |
| Health distribution | Equity | 0. Disease mainly affects the well off  1. Disease mainly affects the poor | “Whether the service addresses the disparities in access and utilisation of needed health services and health status of Kenyans.” (Ministry of Health Kenya, 2018, p.13) | “Services that enhance equity of access and equity of health outcomes at the population level may have priority.” (Ministry of Health Kenya, 2018, p.15) and (Tromp and Baltussen, 2012, p.5) |
| Severity of disease | 0. Mild  1. Moderate  2. Severe | “Whether the service addresses the most debilitating forms of a disease to an individual.” (Ministry of Health Kenya, 2018, p.13) | “Services that focus on a high burden of disease in society may deserve priority.” (Ministry of Health Kenya, 2018, p.16) and (Tromp and Baltussen, 2012, p.5) |
| Financial risk protection | Catastrophic health expenditure | 0. Does not reduce the financial burden of paying out of pocket  1. Reduces the financial burden of paying out of pocket | “Whether including the service in the health benefits package reduces the financial burden of paying out of pocket for the service.” (Ministry of Health Kenya, 2018, p.13) | “Services responsible for the greatest burden of catastrophic health expenditure at the population and individual level are prioritised e.g., interventions of rare and/or emerging diseases might be very costly (because of the small number patients) and could push people into poverty. Therefore, these interventions may deserve priority.” (Ministry of Health Kenya, 2018, p.15) and (Tromp and Baltussen, 2012, p.5) |
| Responsiveness | Burden of disease | 0. Intervention addresses a disease/condition with a low burden.  1. Intervention addresses a disease/condition with a high burden. | “Whether the service addresses a condition/disease that affects many Kenyans.” (Ministry of Health Kenya, 2018, p.13) | “Services that focus on a high burden of disease in society may deserve priority.” (Ministry of Health Kenya, 2018, p.16) and (Tromp and Baltussen, 2012, p.5) |
| Leadership and governance | Congruence with existing priorities | 0. Low Priority  1. Medium Priority  2. High Priority | “Whether the service is in line with constitution, prevailing laws and prevailing health sector policies and priorities as further investments and policies are made.” (Ministry of Health Kenya, 2018, p.13) | “Services that are in line with existing health sector priorities may have priority.” (Ministry of Health Kenya, 2018, p.17) and (Tromp and Baltussen, 2012, p.5) |

Modified from the original one, used in the interviews, by including citations.
