# Supplementary material for: Identifying and Selecting Priority Setting Criteria for an Exploratory Multi-Criteria Decision Analysis Study for Health Benefit Package Design in Kenya
Source: Research Square preprint supplement (doi:10.21203/rs.3.rs-6630410/v1), 2025-05-16
Supplement: Supplementary file 4 [file 904128858ab7d6f3c115f3ad.docx]

**Additional file 5: DCE pilot questionnaire**

**CHOICE EXPERIMENT QUESTIONNAIRE**

Questionnaire id: _______________________ Survey Date: _________________________

Survey time: ___________________________ Interviewer code: _____________________

**SECTION A. INFORMATION ABOUT YOU** *(To be completed by stakeholder)*

1. What is your gender? (*Tick one of the boxes below.)*

Female

Male

☐Other (Specify) ________

1. How old are you? (*Provide age in years*) _____________
2. What is the highest level of education that you have attained/completed? (*Tick one of the boxes below.)*

Completed Doctorate degree (PhD, DPhil, DSc, DrPH)

Completed Master’s degree.

Completed Bachelor’s degree.

Completed Diploma/Higher Diploma

Completed Certificate

Completed Secondary School

Completed Primary school.

Started but not completed primary school

Started formal education.

No formal education

1. What is your main profession? (*Tick one of the boxes below.)*

Medical doctor

Pharmacist

Nurse

Clinical Officer

Public Health Officer

Health Economist

Epidemiologist

Finance/Accounts

Administration

Dentist

Others (specify)_________

1. What is your job title/designation? ____________
2. How long have you worked in this position? (Provide estimate in years) ________
3. What type of organisation do you work for [Skip if you do not work]? ____________
4. [Appears only for those who answered question 7] How long have you worked in this organisation? ________
5. Overall, how many years of work experience do you have [total years of work experience]? _______
6. What stakeholder group do you primarily identify with? (*Tick one of the boxes below. If you belong to more than one group, choose the one that best describes you)*

General public: These are members of the public [If you or your organisation represents patients, tick the option on patient advocacy groups].

Civil Society and NGOs – These are professionals who work in civil society and represent members of the public [If you or your organisation represents patients, tick the option on patient advocacy groups].

Patient advocacy groups - These are patient advocates or professionals who work for patient advocacy groups that represent/advocate for patients.

Academics – These are university lecturers specialising in health-related fields such as Medicine, Public Health, Health Economics, Health Policy, Epidemiology,

Researchers – These are researchers specialising in a health-related fields such as Medicine, Public Health, Health Economics, Health Policy, Epidemiology, Pharmacy etc.

Purchasers – Professionals who purchase/pay for health services on behalf of members/citizens e.g., Chief Officer of Health at Counties, Controller of Budget, Principal Secretaries at Ministry of Health, health insurance organisations (NHIF, Private health insurance, community-based health insurance), Ministry of Finance

Healthcare Providers – These are professionals who provide health care services e.g., diagnosis, treatment, or preventive health services e.g., doctors, nurses, pharmacists, clinical officers, public health officers.

Policy makers – Professionals engaged in health policy making at the Ministry of Health, County level or policy making institutions.

Regulatory Bodies in the health sector e.g., Pharmacy and Poisons Board

Others (specify)_________

1. Which county do you work in? [Select from drop down button] ____________________
2. If different from the county you work in, which county do you live in? [Select from drop down button] ____________

No Yes(specify)_________

1. Have you ever been involved in the development or revision of a health benefit package, essential packages for health, or essential medicines list? [This refers to whether you were part of a committee or group tasked with the development or revision of a benefit package e.g., Health Benefit Package Advisory Panel, NHIF board etc]. (If yes, specify which ones).

No Yes(specify)_________

**SECTION B. CHOICE EXPERIMENT** *(For the respondent to read)*

Universal Health Coverage (UHC) means that everyone should have access to quality health services they need and should not be exposed to financial hardship when accessing those services. In pursuit of UHC, countries are defining a package of health interventions.

(procedures/services, devices, drugs, and vaccines) to make available through their health systems. The Kenyan government has also prioritised achieving UHC.

Assume the government wants to include some health interventions into a UHC benefits package. The questionnaire presents a set of questions each prompting you to choose between two health interventions (Intervention A or B) based on specified criteria. These alternatives differ only by the levels of the following criteria:

1. **Effectiveness and safety** – Whether the intervention delivers an improvement in health status and reduction in mortality and is safe for use. This may either be slightly effective and safe or moderately effective and safe or highly effective and safe.
2. **Catastrophic health expenditure** - Whether including the intervention in the health benefits package reduces the financial burden of paying out of pocket for the service. The intervention may either not reduce the financial burden of paying out of pocket or reduce the financial burden of paying out of pocket.
3. **Health systems capacity requirements** - Whether the intervention can be provided to Kenyans based on existing health system capacity in terms of human resources, medicines, and other service provision requirements. This may either be above national average or below national average.
4. **Equity** - Whether the intervention addresses the disparities in access and utilisation of needed health services and health status of Kenyans. This may either be the disease mainly affects the well off or mainly affects the poor.
5. **Severity of disease** - Whether the intervention addresses the most debilitating forms of a disease to an individual. The intervention may target a disease that is either mild or moderate or severe.
6. **Congruence with existing priorities** - Whether the intervention is in line with constitution, prevailing laws and prevailing health sector policies and priorities as further investments and policies are made. The intervention may be classed either as low priority or medium priority or high priority.

For each task you will be prompted to choose an intervention you prefer among two options namely Intervention A or B. Consider all criteria when making your decisions. If you do not want to answer any of the questions, move on to the next question.

**PRACTICE CHOICE TASK**

**Practice scenario 1** *(Researcher to use this as a demonstration)*

|  | **Intervention A** | **Intervention B** |
| --- | --- | --- |
| **Effectiveness and safety** | Moderately effective and safe | Highly effective and safe |
| **Catastrophic health expenditure** | Reduces the financial burden of paying out of pocket | Does not reduce the financial burden of paying out of pocket |
| **Health systems capacity requirements** | Below national average | Above national average |
| **Equity** | Disease mainly affects the poor | Disease mainly affects the well off |
| **Severity of disease** | Moderate | Mild |
| **Congruence with existing priorities** | Medium | Low Priority |
|  |  |  |
| **I would choose** |  |  |
|  |  |  |

**Practice scenario 2** *(To be completed by stakeholder)*

|  | **Intervention A** | **Intervention B** |
| --- | --- | --- |
| **Effectiveness and safety** | Highly effective and safe | Slightly effective and safe |
| **Catastrophic health expenditure** | Reduces the financial burden of paying out of pocket | Does not reduce the financial burden of paying out of pocket |
| **Health systems capacity requirements** | Above national average | Below national average |
| **Equity** | Disease mainly affects the poor | Disease mainly affects the well off |
| **Severity of disease** | Severe | Mild |
| **Congruence with existing priorities** | High Priority | Low Priority |
|  |  |  |
| **I would choose** |  |  |
|  |  |  |

**Section E: Choice tasks** *(To be completed by Stakeholder)*

**Scenario 1**

|  | **Intervention A** | **Intervention B** |
| --- | --- | --- |
| **Effectiveness and safety** | Slightly effective and safe | Highly effective and safe |
| **Catastrophic health expenditure** | Does not reduce the financial burden of paying out of pocket | Reduces the financial burden of paying out of pocket |
| **Health systems capacity requirements** | Above national average | Below national average |
| **Equity** | Disease mainly affects the poor | Disease mainly affects the well off |
| **Severity of disease** | Severe | Mild |
| **Congruence with existing priorities** | High Priority | Low Priority |
|  |  |  |
| **I would choose** |  |  |
|  |  |  |

**Scenario 2**

|  | **Intervention A** | **Intervention B** |
| --- | --- | --- |
| **Effectiveness and safety** | Highly effective and safe | Moderately effective and safe |
| **Catastrophic health expenditure** | Does not reduce the financial burden of paying out of pocket | Reduces the financial burden of paying out of pocket |
| **Health systems capacity requirements** | Below national average | Above national average |
| **Equity** | Disease mainly affects the well off | Disease mainly affects the poor |
| **Severity of disease** | Moderate | Mild |
| **Congruence with existing priorities** | Medium Priority | High Priority |
|  |  |  |
| **I would choose** |  |  |
|  |  |  |

**Scenario 3**

|  | **Intervention A** | **Intervention B** |
| --- | --- | --- |
| **Effectiveness and safety** | Slightly effective and safe | Highly effective and safe |
| **Catastrophic health expenditure** | Reduces the financial burden of paying out of pocket | Does not reduce the financial burden of paying out of pocket |
| **Health systems capacity requirements** | Below national average | Above national average |
| **Equity** | Disease mainly affects the well off | Disease mainly affects the poor |
| **Severity of disease** | Mild | Moderate |
| **Congruence with existing priorities** | Low Priority | High Priority |
|  |  |  |
| **I would choose** |  |  |
|  |  |  |

**Scenario 4**

|  | **Intervention A** | **Intervention B** |
| --- | --- | --- |
| **Effectiveness and safety** | Moderately effective and safe | Slightly effective and safe |
| **Catastrophic health expenditure** | Reduces the financial burden of paying out of pocket | Does not reduce the financial burden of paying out of pocket |
| **Health systems capacity requirements** | Above national average | Below national average |
| **Equity** | Disease mainly affects the well off | Disease mainly affects the poor |
| **Severity of disease** | Severe | Moderate |
| **Congruence with existing priorities** | Medium Priority | Low Priority |
|  |  |  |
| **I would choose** |  |  |
|  |  |  |

**Scenario 5**

|  | **Intervention A** | **Intervention B** |
| --- | --- | --- |
| **Effectiveness and safety** | Highly effective and safe | Moderately effective and safe |
| **Catastrophic health expenditure** | Reduces the financial burden of paying out of pocket | Does not reduce the financial burden of paying out of pocket |
| **Health systems capacity requirements** | Above national average | Below national average |
| **Equity** | Disease mainly affects the poor | Disease mainly affects the well off |
| **Severity of disease** | Mild | Severe |
| **Congruence with existing priorities** | High Priority | Medium Priority |
|  |  |  |
| **I would choose** |  |  |
|  |  |  |

**Scenario 6**

|  | **Intervention A** | **Intervention B** |
| --- | --- | --- |
| **Effectiveness and safety** | Slightly effective and safe | Moderately effective and safe |
| **Catastrophic health expenditure** | Does not reduce the financial burden of paying out of pocket | Reduces the financial burden of paying out of pocket |
| **Health systems capacity requirements** | Below national average | Above national average |
| **Equity** | Disease mainly affects the well off | Disease mainly affects the poor |
| **Severity of disease** | Mild | Moderate |
| **Congruence with existing priorities** | High Priority | Low Priority |
|  |  |  |
| **I would choose** |  |  |
|  |  |  |

**Scenario 7**

|  | **Intervention A** | **Intervention B** |
| --- | --- | --- |
| **Effectiveness and safety** | Moderately effective and safe | Highly effective and safe |
| **Catastrophic health expenditure** | Does not reduce the financial burden of paying out of pocket | Reduces the financial burden of paying out of pocket |
| **Health systems capacity requirements** | Above national average | Below national average |
| **Equity** | Disease mainly affects the well off | Disease mainly affects the poor |
| **Severity of disease** | Moderate | Severe |
| **Congruence with existing priorities** | Low Priority | Medium Priority |
|  |  |  |
| **I would choose** |  |  |
|  |  |  |

**Scenario 8**

|  | **Intervention A** | **Intervention B** |
| --- | --- | --- |
| **Effectiveness and safety** | Highly effective and safe | Slightly effective and safe |
| **Catastrophic health expenditure** | Does not reduce the financial burden of paying out of pocket | Reduces the financial burden of paying out of pocket |
| **Health systems capacity requirements** | Above national average | Below national average |
| **Equity** | Disease mainly affects the poor | Disease mainly affects the well off |
| **Severity of disease** | Mild | Severe |
| **Congruence with existing priorities** | Medium Priority | High Priority |
|  |  |  |
| **I would choose** |  |  |
|  |  |  |

**Scenario 9**

|  | **Intervention A** | **Intervention B** |
| --- | --- | --- |
| **Effectiveness and safety** | Highly effective and safe | Slightly effective and safe |
| **Catastrophic health expenditure** | Reduces the financial burden of paying out of pocket | Does not reduce the financial burden of paying out of pocket |
| **Health systems capacity requirements** | Below national average | Above national average |
| **Equity** | Disease mainly affects the well off | Disease mainly affects the poor |
| **Severity of disease** | Moderate | Mild |
| **Congruence with existing priorities** | High Priority | Medium Priority |
|  |  |  |
| **I would choose** |  |  |
|  |  |  |

**Scenario 10**

|  | **Intervention A** | **Intervention B** |
| --- | --- | --- |
| **Effectiveness and safety** | Moderately effective and safe | Highly effective and safe |
| **Catastrophic health expenditure** | Reduces the financial burden of paying out of pocket | Does not reduce the financial burden of paying out of pocket |
| **Health systems capacity requirements** | Below national average | Above national average |
| **Equity** | Disease mainly affects the poor | Disease mainly affects the well off |
| **Severity of disease** | Moderate | Severe |
| **Congruence with existing priorities** | Medium Priority | Low Priority |
|  |  |  |
| **I would choose** |  |  |
|  |  |  |

**Scenario 11**

|  | **Intervention A** | **Intervention B** |
| --- | --- | --- |
| **Effectiveness and safety** | Moderately effective | Slightly effective and safe |
| **Catastrophic health expenditure** | Does not reduce the financial burden of paying out of pocket | Reduces the financial burden of paying out of pocket |
| **Health systems capacity requirements** | Below national average | Above national average |
| **Equity** | Disease mainly affects the poor | Disease mainly affects the well off |
| **Severity of disease** | Severe | Moderate |
| **Congruence with existing priorities** | Low Priority | Medium Priority |
|  |  |  |
| **I would choose** |  |  |
|  |  |  |

**Scenario 12**

|  | **Intervention A** | **Intervention B** |
| --- | --- | --- |
| **Effectiveness and safety** | Slightly effective and safe | Moderately effective and safe |
| **Catastrophic health expenditure** | Reduces the financial burden of paying out of pocket | Does not reduce the financial burden of paying out of pocket |
| **Health systems capacity requirements** | Above national average | Below national average |
| **Equity** | Disease mainly affects the poor | Disease mainly affects the well off |
| **Severity of disease** | Severe | Mild |
| **Congruence with existing priorities** | Low Priority | High Priority |
|  |  |  |
| **I would choose** |  |  |
|  |  |  |

End
