# Supplementary material for: Identifying and Selecting Priority Setting Criteria for an Exploratory Multi-Criteria Decision Analysis Study for Health Benefit Package Design in Kenya
Source: Research Square preprint supplement (doi:10.21203/rs.3.rs-6630410/v1), 2025-05-16
Supplement: Supplementary file 5 [file a3115811994a1f2cc1aea912.docx]

**Additional file 6: Relative importance estimates**

| **Criteria** | **Effect** | **Level difference** | **Maximum effect** | **Relative importance** | **Robust standard error** |
| --- | --- | --- | --- | --- | --- |
| Catastrophic health expenditure | 1.218 | 1.000 | 1.218 | 26.49% | 16.65%, 36.33% |
| Congruence with existing priorities | 0.860 | 1.000 | 0.860 | 18.69% | 9.50%, 27.89% |
| Effectiveness and safety of intervention | 0.856 | 1.000 | 0.856 | 18.62% | 11.44%, 25.79% |
| Equity | 0.830 | 1.000 | 0.830 | 18.04% | 11.67%, 24.41% |
| Health systems capacity | 0.208 | 1.000 | 0.208 | 4.53% | -6.03%, 15.09% |
| Severity of disease | 0.627 | 1.000 | 0.627 | 13.63% | 4.85%, 22.41% |
|  |  |  | 4.600 |  |  |

Robust standard errors and hence confidence intervals were computed using the delta method.
