# Supplementary material for: Identifying and Selecting Priority Setting Criteria for an Exploratory Multi-Criteria Decision Analysis Study for Health Benefit Package Design in Kenya
Source: Research Square preprint supplement (doi:10.21203/rs.3.rs-6630410/v1), 2025-05-16
Supplement: Supplementary file 6 [file b46e1f3b2a7301bada67daa2.docx]

**Additional file 4: Criteria, levels, and priors**

| **Criterion** | **Levels** | **Lay definition** | **Technical definition** | **Predicted sign of parameter** | **Rationale of sign (from HBPAP technical definition column and MCDA studies)** | **Priors used** |
| --- | --- | --- | --- | --- | --- | --- |
| Effectiveness and safety | 0. Slightly effective and safe  1. Moderately effective and safe  2. Highly effective and safe | “Whether the service delivers an improvement in health status and reducing mortality and is safe for use.” [9, p.13] | “Services that are effective and safe in improving and maintaining health status and reducing mortality as measured at individual or population level will be prioritised.” [9, p.15] and [41, p.5] | Positive | “Interventions that are highly effective and safe will be prioritised.” [9, p.52] and [41, p.5] | 0. Base Level 1. 0.000000001 2. 0.000000002 |
| Health systems capacity requirements | 0. Below national average  1. Above national average | “Whether the service can be provided to Kenyans based on existing health system capacity in terms of human resources, medicines, and other service provision requirements.” [9, p.13] | “Services that are easy to implement because of the current service capacity may have priority. E.g., availability of service infrastructure, delivery models, safety and quality and management” [9, p.16] and [41, p.5].  “Services that are easy to implement because of the current medical products, vaccines and technology capacity may have priority. E.g., is a drug or commodity available in the Kenyan market? Is there reliability in procurement?” [9, p.16] and [41, p.5] | Positive | “Interventions that are feasible will be prioritised” [9, p.53] and [41, p.5]. | 0.000000004 |
| Equity | 0. Disease mainly affects the well off  1. Disease mainly affects the poor | “Whether the service addresses the disparities in access and utilisation of needed health services and health status of Kenyans.” [9, p.13] | “Services that enhance equity of access and equity of health outcomes at the population level may have priority.” [9, p.15] and [41, p.5] | Positive | “Interventions that address equity concerns will be prioritised” [9, p.53] and [41, p.5]. | 0.000000005 |
| Severity of disease | 0. Mild  1. Moderate  2. Severe | “Whether the service addresses the most debilitating forms of a disease to an individual.” [9, p.13] | “Services that focus on the most debilitating forms of disease in society may deserve priority.” [9, p.16] and [41, p.5] | Positive | “Interventions that target severe forms of disease will be prioritised” [9, p.52] and [41, p.5]. | 0. Base Level 1. 0.000000006 2. 0.000000007 |
| Catastrophic health expenditure | 0. Does not reduce the financial burden of paying out of pocket  1. Reduces the financial burden of paying out of pocket | “Whether including the service in the health benefits package reduces the financial burden of paying out of pocket for the service.” [9, p.13] | “Services responsible for the greatest burden of catastrophic health expenditure at the population and individual level are prioritised e.g., interventions of rare and/or emerging diseases might be very costly (because of the small number patients) and could push people into poverty. Therefore, these interventions may deserve priority.” [9, p.15] and [41, p.5] | Positive | “Interventions that reduce financial burden while paying out of pocket will be prioritised” [9, p.53] and [41, p.5]. | 0.000000003 |
| Congruence with existing priorities | 0. Low Priority  1. Medium Priority  2. High Priority | “Whether the service is in line with constitution, prevailing laws and prevailing health sector policies and priorities as further investments and policies are made.” [9, p.13] | “Services that are in line with existing health sector priorities may have priority.” [9, p.17] and [41, p.5] | Positive | “Interventions that are high on the country's priorities will be prioritised” [9, p.54] and [41, p.5] | 0. Base level 1. 0.000000008 2. 0.000000009 |
