# Supplementary material for: Identifying and Selecting Priority Setting Criteria for an Exploratory Multi-Criteria Decision Analysis Study for Health Benefit Package Design in Kenya
Source: Research Square preprint supplement (doi:10.21203/rs.3.rs-6630410/v1), 2025-05-16
Supplement: Supplementary file 7 [file c66f94f4f0b3206d86e7f855.docx]

**Additional file 7: Comments by stakeholders**

| **Domain** | **Criterion** | **Probable levels** | **Lay definition** | **Technical definition** | **Comments from interviews** | **Quotes** |
| --- | --- | --- | --- | --- | --- | --- |
| Health level | Effectiveness and safety | 0. Slightly effective and safe 1. Moderately effective and safe 2. Highly effective and safe | “Whether the service delivers an improvement in health status and reducing mortality and is safe for use.” [9, p.13] | “Services that are effective and safe in improving and maintaining health status and reducing mortality as measured at individual or population level will be prioritised.” [9, p.15] and [41, p.5] | Some stakeholders had an issue with bundling together effectiveness and safety. They noted that some interventions could be effective but not safe. | “… it’s an important criterion… The only thing now, if…All of them are slightly effective and safe. I mean would they… since they have different definitions…That’s now the challenge… What if something is effective but it’s not safe to use on a large scale? … So, I am just thinking … where it will be useful to separate the effectiveness and safety… So, it may still be useful to separate…. Effectiveness and safety.” – Stakeholder one |
| Feasibility | Health systems capacity requirements | 0. Below national average 1. Above national average | “Whether the service can be provided to Kenyans based on existing health system capacity in terms of human resources, medicines, supplies, and other service provision requirements.” [9, p.13] | “Services that are easy to implement because of the current service capacity may have priority. E.g., availability of service infrastructure, delivery models, safety and quality and management.” [9, p.16] and [41, p.5]  “Services that are easy to implement because of the current medical products, vaccines and technology capacity may have priority. E.g., is a drug or commodity available in the Kenyan market? Is there reliability in procurement?” [9, p.16] and [41, p.5] | There were comments for that the levels "below national average and above national average" were not understandable. | “So, what do you mean by below national average and above national average?... That’s the part I’m still not getting. Is below less, does not have capacity, or within capacity? Or which one is it? Is it below? Does below mean it’s within capacity?” – Stakeholder one  “And the probable levels… we have here is just below national average or above national average… That to me… is a bit ambiguous” – Stakeholder four |
| Health distribution | Equity | 0. Disease mainly affects the well off 1. Disease mainly affects the poor | “Whether the service addresses the disparities in access and utilisation of needed health services and health status of Kenyans.” [9, p.13] | “Services that enhance equity of access and equity of health outcomes at the population level may have priority.” [9, p.15] and [41, p.5]. | Equity was viewed as a key criterion in UHC as the poor are a vulnerable group and constitute most of most populations.  Equity was defined according to social economic status. There were suggestions to consider other aspects such as religion and gender in the equity criterion and potentially create a composite metric. | “Yeah, of course. That is, uh, it's something that can be well defined and determined.” – Stakeholder four  “Equity is very important… when it comes to… health care provision. Yeah, it’s very key because you can come up with intervention that will only benefit a certain population and the majority will not benefit from it. So, I think equity is key” – Stakeholder seven |
| Severity of disease | 0. Mild 1. Moderate 2. Severe | “Whether the service addresses the most debilitating forms of a disease to an individual.” [9, p.13] | “Services that focus on a high burden of disease in society may deserve priority.” [9, p.16] and [41, p.5] | The criterion was clear and well understood by experts.  Though severity of disease was seen as salient, it was least preferred when compared with burden of disease. | “Severity of disease, uhm. I think that’s important.” – Stakeholder six.  “Oh yeah, this one is really important… because… I think, just dividing it into mild, moderate or… severe… it makes a difference,… because that's now the clinical definition and you can easily cost like how much do you need… like for a sickler getting mild crisis, a moderate, or severe, yeah.” – Stakeholder nine |
| Financial risk protection | Catastrophic health expenditure | 0. Does not reduce the financial burden of paying out of pocket 1. Reduces the financial burden of paying out of pocket | “Whether including the service in the health benefits package reduces the financial burden of paying out of pocket for the service.” [9, p.13] | “Services responsible for the greatest burden of catastrophic health expenditure at the population and individual level are prioritised e.g., interventions of rare and/or emerging diseases might be very costly (because of the small number patients) and could push people into poverty. Therefore, these interventions may deserve priority.” [9, p.15] and [41, p.5] | The criterion was viewed as salient, a key government priority, and pillar of UHC | “…I know this is what the government is doing is one of the… pillars, Okay what do they call it?.. financial risk protection… the pillars of universal health coverage…I’m looking for the term… The big four agenda. Yes, this is one of them. Aahhhh this is important, I think it’s important.” - Stakeholder seven  “Financial risk protection. Uhm, I think this will also affect comprehensiveness of the services… Especially for diseases that…Cause a lot of uhm financial issues like cancer and…NCDs… So yeah,… it’s still something that should be considered as well.” – Stakeholder six |
| Responsiveness | Burden of disease | 0. Intervention addresses a disease/condition with a low burden. 1. Intervention addresses a disease/condition with a high burden. | “Whether the service addresses a condition/disease that affects many Kenyans.” [9, p.13] | “Services that focus on a high burden of disease in society may deserve priority.” [9, p.16] and [41, p.5] | Stakeholders mentioned that a "medium" level should be added to the levels  Overall, almost all experts preferred burden of disease over severity when prompted to choose between the two criteria. First, burden of disease would ensure interventions that target larger populations are prioritised. Second, depending on how burden of disease metric is computed, it can include severity in the calculation | “I would choose, I would choose burden, because in burden you can put severity, and you see already you've dichotomized it into low and high, so there's always an opportunity for getting the the medium. You see, you’d easily get, you see for severity you have your mild moderate, and severe, so you could easily just create a, a two, 0 1, 2. Yes. So, you have your one being your medium, and two being your high or however, however you want to put it.” – Stakeholder nine  “…I would go for burden of disease at the end of the day… That is what equity is all about… You provide an intervention that achieves the highest impact in the community and the population… You know it's not, it’s like having an MRI machine for example that serves two people as opposed to having uhm you know ORS Oral Rehydration Salts that serves the majority of people. So, I would…. go for the burden of disease.” – Stakeholder seven |
| Leadership and governance | Congruence with existing priorities | 0. Low Priority 1. Medium Priority 2. High Priority | “Whether the service is in line with constitution, prevailing laws and prevailing health sector policies and priorities as further investments and policies are made.” [9, p.13] | “Services that are in line with existing health sector priorities may have priority.” [9, p.17] and [41, p.5]. | The criterion was viewed as salient and relevant to the decision context. The level of the criterion were noted as good and therefore tradeable. However, the criterion needed political will and commitment. | "So, whatever we do has to be in congruence with existing policy and laws.” – Stakeholder seven  “Yeah, this one, I think low, medium, and high… would actually be a good one.” – Stakeholder nine. |

Criteria and definitions were derived from HBPAP’s report [9]. HBPAP had obtained the criteria and definitions from Tromp and Baltussen [41].
